# Supplementary material for: Gain-of-function mutation in SCN11A causes itch and affects neurogenic inflammation and muscle function in Scn11a+/L799P mice
Source: PubMed Central journal article supplement (PMC7440628; doi:10.1371/journal.pone.0237101), 2020-08-20

**S1 Table.** Comparison of mean gender differences.

| Figure<br>(description; unit)                                                             | Scn11a <sup>+/+</sup> (mean ± SEM) |                                | Scn11a <sup>+L799P</sup> (mean ± SEM) |                                   |
|-------------------------------------------------------------------------------------------|------------------------------------|--------------------------------|---------------------------------------|-----------------------------------|
|                                                                                           | female Scn11a <sup>+/+</sup> (n)   | male Scn11a <sup>+/+</sup> (n) | female Scn11a <sup>+L799P</sup> (n)   | male Scn11a <sup>+L799P</sup> (n) |
| <b>1A</b> (Scratching, <b>mature</b> mice; bouts/60 min)                                  | 4.54 ± 1.31                        |                                | 3.00 ± 0.74                           |                                   |
|                                                                                           | 6.86 ± 2.06 (6)                    | 1.83 ± 0.54 (7)                | 1.75 ± 1.11 (4)                       | 3.56 ± 0.92 (9)                   |
| <b>1A</b> (Scratching, <b>middle-aged</b> mice; bouts/60 min)                             | 3.88 ± 1.27                        |                                | 13.86 ± 4.33                          |                                   |
|                                                                                           | 7.00 ± 0 (2)                       | 2.83 ± 1.27 (6)                | 6.00 ± 0 (1)                          | 15.17 ± 4.88 (6)                  |
| <b>1B</b> (Grooming, <b>middle-aged</b> mice; chains/60 min)                              | 25.22 ± 2.69                       |                                | 28.13 ± 2.30                          |                                   |
|                                                                                           | 30.67 ± 6.12 (3)                   | 22.50 ± 2.32 (6)               | 28.00 ± 1.00 (2)                      | 28.17 ± 3.13 (6)                  |
| <b>2A</b> (CGRP <sup>+</sup> neurons, <b>middle-aged</b> mice; %)                         | 35.02 ± 0.92                       |                                | 34.26 ± 2.59                          |                                   |
|                                                                                           | 35.95 ± 0.87 (4)                   | 32.50 (1)                      | 34.95 ± 4.35 (2)                      | 33.98 ± 3.48 (5)                  |
| <b>2E</b> (CGRP release, <b>mature</b> mice; pg/ml)<br><i>0 M Capsaicin</i>               | 25.15 ± 2.61                       |                                | -                                     |                                   |
|                                                                                           | 21.40 ± 3.50 (2)                   | 28.90 ± 0.60 (2)               | -                                     | -                                 |
| <b>2E</b> (CGRP release, <b>mature</b> mice; pg/ml)<br><i>10<sup>-8</sup> M Capsaicin</i> | 35.33 ± 2.79                       |                                | -                                     |                                   |
|                                                                                           | 33.30 ± 5.70 (2)                   | 37.35 ± 2.45 (2)               | -                                     | -                                 |

**Supplement Table 1 continued**

| Figure<br>(description; unit)                                                                             | Scn11a <sup>+/+</sup> (mean ± SEM) |                                | Scn11a <sup>+/<sup>L799P</sup></sup> (mean ± SEM) |                                               |
|-----------------------------------------------------------------------------------------------------------|------------------------------------|--------------------------------|---------------------------------------------------|-----------------------------------------------|
|                                                                                                           | female Scn11a <sup>+/+</sup> (n)   | male Scn11a <sup>+/+</sup> (n) | female Scn11a <sup>+/<sup>L799P</sup></sup> (n)   | male Scn11a <sup>+/<sup>L799P</sup></sup> (n) |
| <b>2E</b> (CGRP release, <b>mature</b> mice; pg/ml)<br><i>10<sup>-7</sup> M Capsaicin</i>                 | 66.13 ± 8.91                       |                                | -                                                 |                                               |
|                                                                                                           | 60.15 ± 13.65 (2)                  | 72.10 ± 14.80 (2)              | -                                                 | -                                             |
| <b>2E</b> (CGRP release, <b>mature</b> mice; pg/ml)<br><i>10<sup>-6</sup> M Capsaicin</i>                 | 378.8 ± 20.62                      |                                | -                                                 |                                               |
|                                                                                                           | 378.8 ± 20.62 (6)                  | -                              | -                                                 | -                                             |
| <b>2F</b> (CGRP release, <b>mature</b> mice; pg/ml)<br><i>Baseline (BL) release</i>                       | 26.60 ± 2.06                       |                                | 11.01 ± 1.11                                      |                                               |
|                                                                                                           | 28.13 ± 2.53 (15)                  | 22.77 ± 3.26 (6)               | - (0)                                             | 28.13 ± 2.53 (15)                             |
| <b>2F</b> (CGRP release, <b>mature</b> mice; pg/ml)<br><i>Release after Capsaicin (CAPS)</i>              | 49.98 ± 6.16                       |                                | 12.40 ± 2.74                                      |                                               |
|                                                                                                           | 48.07 ± 6.96 (7)                   | 53.33 ± 13.14 (4)              | - (0)                                             | 48.07 ± 6.96 (7)                              |
| <b>2F</b> (CGRP release, <b>mature</b> mice; pg/ml)<br><i>Release after Washout</i>                       | 3.58 ± 1.40                        |                                | 0.05 ± 0.05                                       |                                               |
|                                                                                                           | 3.30 ± 2.03 (7)                    | 4.08 ± 1.85 (4)                | - (0)                                             | 3.30 ± 2.03 (7)                               |
| <b>3A</b> ( <i>B. subtilis</i> in faeces, <b>mature</b> mice; log CFU/ ml)<br><i>0h after application</i> | 0                                  |                                | 0.10 ± 0.10                                       |                                               |
|                                                                                                           | 0 (5)                              | 0 (5)                          | 0.20 ± 0.20 (5)                                   | 0 (5)                                         |

**Supplement Table 1 continued**

| Figure<br>(description; unit)                                                                      | Scn11a <sup>+/+</sup> (mean ± SEM) |                                | Scn11a <sup>+/<sup>L799P</sup></sup> (mean ± SEM) |                                               |
|----------------------------------------------------------------------------------------------------|------------------------------------|--------------------------------|---------------------------------------------------|-----------------------------------------------|
|                                                                                                    | female Scn11a <sup>+/+</sup> (n)   | male Scn11a <sup>+/+</sup> (n) | female Scn11a <sup>+/<sup>L799P</sup></sup> (n)   | male Scn11a <sup>+/<sup>L799P</sup></sup> (n) |
| <b>3A</b> (B. subtilis in faeces, <b>mature</b> mice; log CFU/ ml)<br><i>3h after application</i>  | 3.54 ± 0.54                        |                                | 4.46 ± 0.52                                       |                                               |
|                                                                                                    | 2.79 ± 0.88 (5)                    | 4.29 ± 0.50 (5)                | 4.82 ± 0.15 (5)                                   | 4.10 ± 1.06 (5)                               |
| <b>3A</b> (B. subtilis in faeces, <b>mature</b> mice; log CFU/ ml)<br><i>6h after application</i>  | 5.87 ± 0.17                        |                                | 5.71 ± 0.21                                       |                                               |
|                                                                                                    | 5.99 ± 0.19 (5)                    | 5.75 ± 0.29 (5)                | 5.74 ± 0.29 (5)                                   | 5.67 ± 0.34 (5)                               |
| <b>3A</b> (B. subtilis in faeces, <b>mature</b> mice; log CFU/ ml)<br><i>9h after application</i>  | 5.57 ± 0.14                        |                                | 5.52 ± 0.13                                       |                                               |
|                                                                                                    | 5.77 ± 0.13 (5)                    | 5.38 ± 0.23 (5)                | 5.49 ± 0.21 (5)                                   | 5.55 ± 0.17 (5)                               |
| <b>3A</b> (B. subtilis in faeces, <b>mature</b> mice; log CFU/ ml)<br><i>15h after application</i> | 5.04 ± 0.22                        |                                | 5.04 ± 0.25                                       |                                               |
|                                                                                                    | 5.02 ± 0.32 (5)                    | 5.06 ± 0.33 (5)                | 4.85 ± 0.39 (5)                                   | 5.23 ± 0.47 (5)                               |
| <b>3A</b> (B. subtilis in faeces, <b>mature</b> mice; log CFU/ ml)<br><i>24h after application</i> | 3.95 ± 0.34                        |                                | 3.44 ± 0.39                                       |                                               |
|                                                                                                    | 3.93 ± 0.47 (5)                    | 3.97 ± 0.54 (5)                | 3.16 ± 0.65 (5)                                   | 3.72 ± 0.47 (5)                               |
| <b>3B</b> (Mean transit time, <b>mature</b> mice; h)                                               | 11.10 ± 0.24                       |                                | 10.53 ± 0.25                                      |                                               |
|                                                                                                    | 11.33 ± 0.42 (5)                   | 10.88 ± 0.23 (5)               | 10.10 ± 0.39 (5)                                  | 10.95 ± 0.22 (5)                              |

**Supplement Table 1 continued**

| Figure<br>(description; unit)                                    | Scn11a <sup>+/+</sup> (mean ± SEM) |                                | Scn11a <sup>+/<sup>L799P</sup></sup> (mean ± SEM) |                                               |
|------------------------------------------------------------------|------------------------------------|--------------------------------|---------------------------------------------------|-----------------------------------------------|
|                                                                  | female Scn11a <sup>+/+</sup> (n)   | male Scn11a <sup>+/+</sup> (n) | female Scn11a <sup>+/<sup>L799P</sup></sup> (n)   | male Scn11a <sup>+/<sup>L799P</sup></sup> (n) |
| <b>4A</b> (Grip strength, <b>mature</b> mice; g)                 | 63.19 ± 2.24                       |                                | 55.93 ± 3.90                                      |                                               |
|                                                                  | 62.67 ± 3.00 (7)                   | 64.10 ± 3.79 (4)               | 48.13 ± 5.92 (5)                                  | 62.43 ± 3.72 (6)                              |
| <b>4A</b> (Grip strength, <b>middle-aged</b> mice; g)            | 48.21 ± 5.00                       |                                | 29.68 ± 3.93                                      |                                               |
|                                                                  | 42.10 (1)                          | 49.09 ± 5.68 (7)               | 19.00 (1)                                         | 31.21 ± 4.18 (7)                              |
| <b>4B</b> (Body weight, <b>mature</b> mice; g)                   | 25.04 ± 1.16                       |                                | 24.55 ± 0.88                                      |                                               |
|                                                                  | 22.71 ± 0.63 (7)                   | 29.13 ± 1.48 (4)               | 21.80 ± 0.58 (5)                                  | 26.83 ± 0.57 (6)                              |
| <b>4B</b> (Body weight, <b>middle-aged</b> mice; g)              | 30.38 ± 0.17                       |                                | 31.36 ± 1.36                                      |                                               |
|                                                                  | 30.30 (1)                          | 30.39 ± 0.20 (7)               | 25.70 (1)                                         | 32.17 ± 1.26 (7)                              |
| <b>4C</b> (Slow type myosin isoform, <b>middle-aged</b> mice; ‰) | 8.47 ± 3.13                        |                                | 4.31 ± 1.16                                       |                                               |
|                                                                  | 22.73 (1)                          | 5.62 ± 1.59 (5)                | 3.44 ± 1.51 (3)                                   | 5.19 ± 1.93 (3)                               |
| <b>4C</b> (Fast type myosin isoform, <b>middle-aged</b> mice; ‰) | 991.53 ± 3.13                      |                                | 995.69 ± 1.16                                     |                                               |
|                                                                  | 977.27 (1)                         | 994.38 ± 1.59 (5)              | 996.56 ± 1.51 (3)                                 | 994.81 ± 1.93 (3)                             |

**Supplement Table 1 continued**

| <b>Figure</b><br>(description; unit)                             | <b>Scn11a<sup>+/+</sup></b> (mean ± SEM) |                                      | <b>Scn11a<sup>+/L799P</sup></b> (mean ± SEM) |                                          |
|------------------------------------------------------------------|------------------------------------------|--------------------------------------|----------------------------------------------|------------------------------------------|
|                                                                  | <b>female Scn11a<sup>+/+</sup></b> (n)   | <b>male Scn11a<sup>+/+</sup></b> (n) | <b>female Scn11a<sup>+/L799P</sup></b> (n)   | <b>male Scn11a<sup>+/L799P</sup></b> (n) |
| <b>5A</b> (Ladder climbing missteps, <b>middle-aged</b> mice; %) | 1.94 ± 0.66                              |                                      | 2.44 ± 0.46                                  |                                          |
|                                                                  | 1.34 (1)                                 | 2.06 ± 0.80 (5)                      | 1.69 (1)                                     | 2.59 ± 0.53 (5)                          |
| <b>5B</b> (Foot-base-angle, <b>middle-aged</b> mice; °)          | 62.68 ± 1.15                             |                                      | 60.55 ± 1.37                                 |                                          |
|                                                                  | 61.80 (1)                                | 62.83 ± 1.35 (6)                     | 64.11 ± 3.27 (2)                             | 59.36 ± 1.30 (6)                         |
| <b>5D</b> (Knee joint diameter, <b>mature</b> mice; mm)          | 4.75 ± 0.04                              |                                      | 4.67 ± 0.04                                  |                                          |
|                                                                  | 4.51 ± 0.04 (20)                         | 4.99 ± 0.02 (20)                     | 4.49 ± 0.03 (20)                             | 4.85 ± 0.05 (20)                         |
| <b>5E</b> (Metatarsal joint diameter, <b>mature</b> mice; mm)    | 1.66 ± 0.02                              |                                      | 1.71 ± 0.02                                  |                                          |
|                                                                  | 1.60 ± 0.02 (20)                         | 1.73 ± 0.02 (20)                     | 1.67 ± 0.03 (20)                             | 1.76 ± 0.03 (20)                         |
| <b>5F</b> (Elbow joint diameter, <b>mature</b> mice; mm)         | 3.53 ± 0.03                              |                                      | 3.41 ± 0.03                                  |                                          |
|                                                                  | 3.40 ± 0.02 (20)                         | 3.67 ± 0.03                          | 3.30 ± 0.02 (20)                             | 3.52 ± 0.04 (20)                         |
| <b>5G</b> (Metacarpal joint diameter, <b>mature</b> mice; mm)    | 1.58 ± 0.01                              |                                      | 1.54 ± 0.02                                  |                                          |
|                                                                  | 1.54 ± 0.02 (20)                         | 1.62 ± 0.02 (20)                     | 1.49 ± 0.03 (20)                             | 1.59 ± 0.03 (20)                         |

### Supplement Table 1 continued

Power spectra of field potential recordings of the Tunica muscularis of the small intestine as shown in Figure 3D. (A) Both genotypes and all genders included are displayed. (B) Power spectra of *Scn11a*<sup>+/+</sup> mice are divided for male and female mice. *m* male, *f* female

A

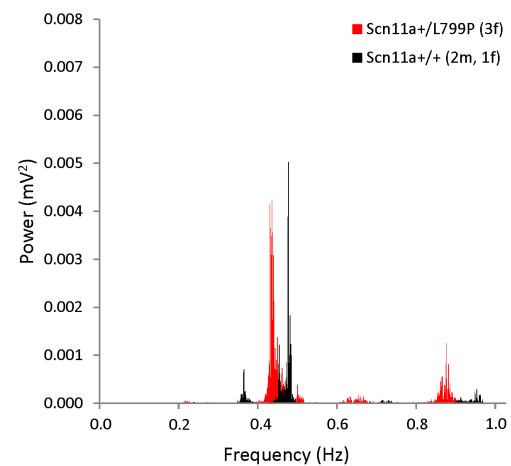

B

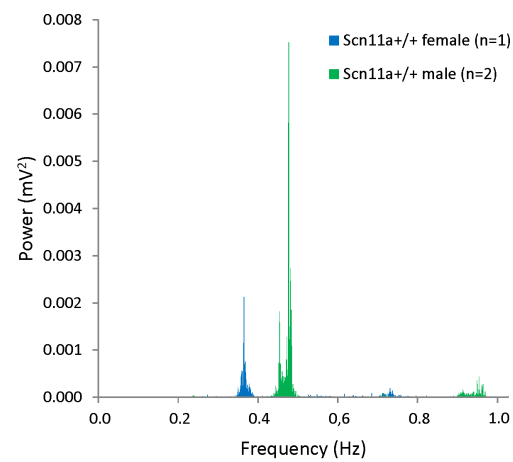

Supplement: pone.0237101.s001.pdf [file pone.0237101.s001.pdf]
